# Supplementary material for: Connexons Coupling to Gap Junction Channel: Potential Role for Extracellular Protein Stabilization Centers
Source: MDPI journal article supplement (doi:10.3390/biom12010049), 2021-12-30
Supplement: s1 [file s1]

# **Connexons Coupling to Gap Junction Channel: Potential Role for Extracellular Protein Stabilization Centers**

László Héja\*, Ágnes Simon, Zsolt Szabó and Julianna Kardos

Institute of Organic Chemistry, Research Centre for Natural Sciences, Magyar tudósok körútja 2, 1117, Budapest, Hungary.

## **Supplementary Information (SI)**

### **SI Figures**

SI Figure S1. Sequence alignment between Cx43 and Cx26.

SI Figure S2. Schematic representation of stabilization center (SC) elements.

SI Figure S3. Side view of the dodecameric GJC assembly of Cx43 subunits.

SI Figure S4. Fluctuation dynamics of trans-junctional stabilization centres (SCs) of Cx43 GJC model, embedded in two membranes.

SI Figure S5. Fluctuation dynamics of intra-subunit, inter-loop stabilization centres (SCs) of Cx43 GJC model, embedded in two membranes.

### **SI Tables**

SI Table S1. Anatomical distribution of Cx43 GJC versus Cx36 GJC subtypes in the brain.

### **SI References**

```

Cx43 1 MGDWSALGKLLDKVQAYSTAGGKVWLSVLFIIFRILLLTAVESAWGDEQSAFRCNTQQPGCENVCYDKSFPISHVRFWVL 80
Cx26 1 -MDWGTILQTILGGVNHSTSIGKIWLTVLFIIFRIMILVVAKEVWGDEQADFVCNTLQPGCKNVCYDHYFPISHIRLWAL 79

Cx43 81 QIIFVSVPTLLYL AHVFYVMRKEEKLNKKEEELKVAQTDGVNVDMLKQIEIKFKYGIEEHGKVKMRGGLRITYIISIL 160
Cx26 80 QLIFVSTPALLVAMHVAYRRHEKKRKFIFKGEIK-----SEF--KDIE--EI-----KTQKVRIEGSLWWTYTSSIF 141

Cx43 161 FKSIFEVAFLLIQWYIY-GFSLSAVYTCKRDPCPHQVDCFLSRPTEKTIFIIFMLVSVSLALNIELEFYVFFKGVKDR 239
Cx26 142 FRVIFEAAFMYVFYVMYDGFMSQRLVKCNAWPCPNTVDCFVSRPTEKTVFTVFMIASGICILLNVTCLYLLIRYCSGK 221

Cx43 240 VKGKSDPYHATSGALSPAKDCGSQKYAYFNGCSSPTAPLSPMSPPGYKLVTDGRNNSSCRNYNQASEQNWANYSAEQNR 319
Cx26 222 SKKP-----

Cx43 320 MGQAGSTISNSHAQPFDFPDDNQNSKKLAAGHELQPLAIVDQRPSSRASSRASSRPRPDDEI
Cx26 -----

```

**SI Figure S1. Alignment between Cx43 and Cx26** [Simon et al., 2020]. Sequence alignment between Cx43 and Cx26 (PDB code: 2zw3) [Maeda et al., 2009] generated by Swiss-Model show high sequence similarity. It appears in the extracellular domain and at transmembrane (TM) regions between TM1 and TM2 along with TM3 and TM4 regions. Insertions and deletions are found only in the intracellular regions. Amino acids (AA) of Cx43 and Cx26 TM regions are shown in red.

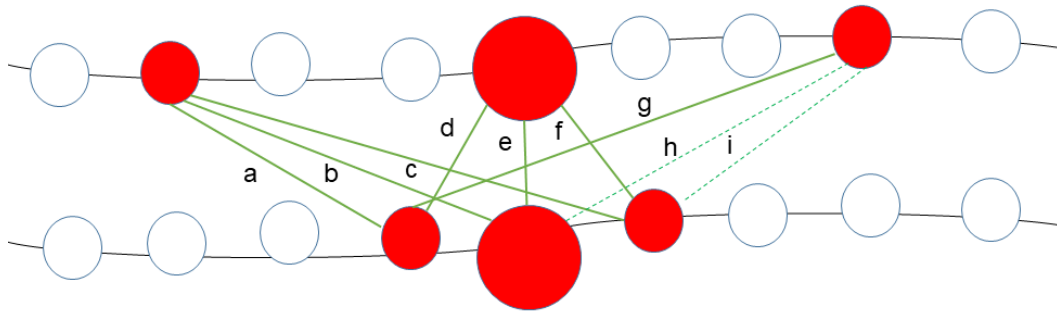

**SI Figure S2. Schematic representation of stabilization center (SC) elements** (*modified after* [Nyikos et al., 2002; Simon et al., 2001]). The central amino acid residues (AAs) are indicated by large red circles. In addition, small circles on each side (*flanking tetrapeptides*) comprise the supporting AAs filled in red. These three red AAs on each chain (*triplets*) form potential contacts (lines "a-i"). The central residues form an SC if they are at least 10 residues away in sequence, and it is possible to select two neighbours from their *flanking tetrapeptides*, so that the resulting two *triplets* form 7 contacts ("a-g", green solid lines). Two missing contacts "h-i" are indicated by green dots [Dosztányi et al., 1997]. Two AAs are considered to be in contact if at least one of their atoms are closer than  $VWR(1) + VWR(2) + 1$  (Å), where VWR designates van der Waals radii (VWR). For a list of atomic VWRs see: <https://github.com/evocellnet/int3dInterfaces/blob/master/vdw.radii>

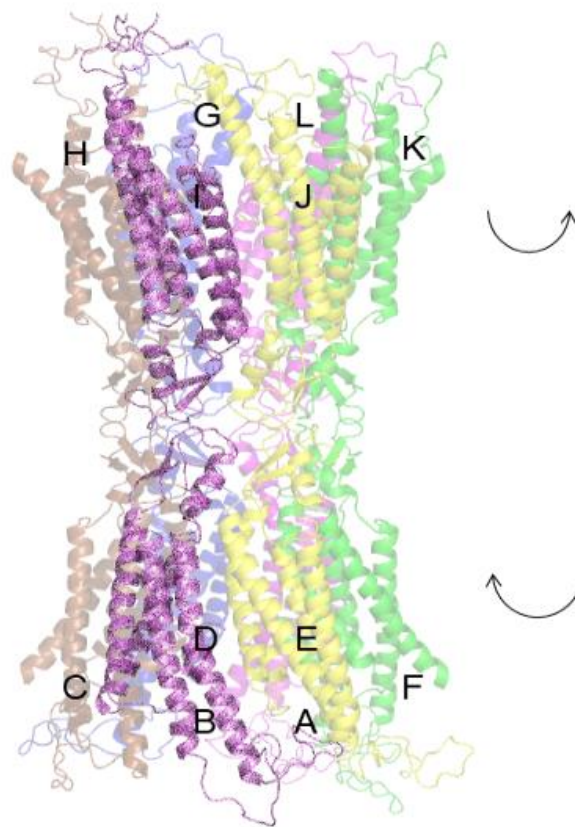

**SI Figure S3. Side view of the dodecameric GJC assembly of Cx43 subunits.** After Maeda et al. [2009]. Both Cx43HC contain six subunits that are coloured as follows: A & J: yellow, B & I: violet (highlighted), C & H: brown, D & G: blue, E & L: magenta, F & K: green. Note, that the subunits of HC<sub>pre</sub> and HC<sub>post</sub> follow counter-clockwise and clockwise directions, respectively.

**A****GJC transjunctional SCs, closed S-S**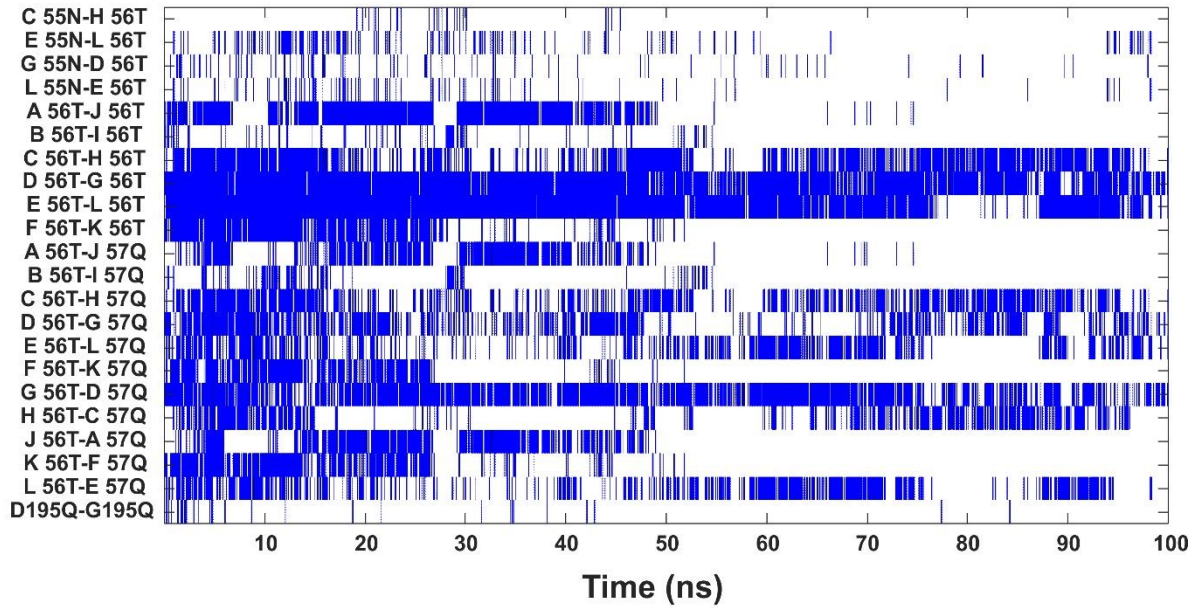**B****GJC transjunctional SCs, open S-S**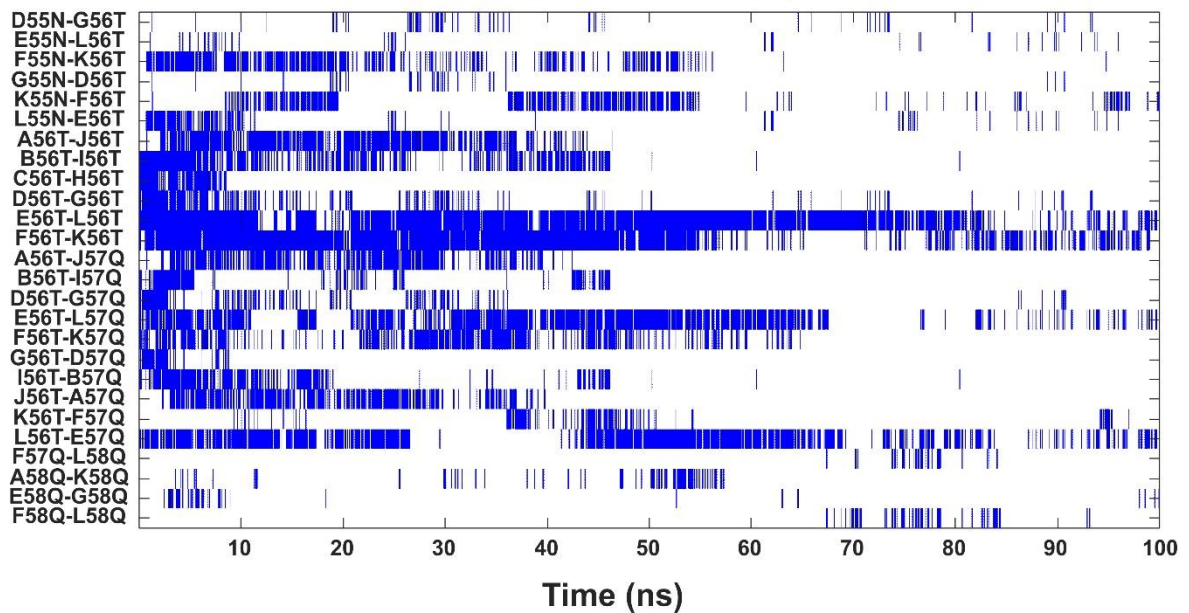

**SI Figure S4. Fluctuation dynamics of trans-junctional stabilization centres (SCs) of Cx43 GJC model, embedded in two membranes.** 100 ns MD simulation was performed at 300 K. S-S bonds were kept intact during the MD simulation (**A**) or have been opened up at the start of the MD simulation (**B**). Each line corresponds to a single SC pair. The residues forming a single SC pair are displayed as the y axis. First letter of each residue represents the subunit (A to F corresponds to the pre-junctional, G to L corresponds to the post-junctional subunits). Only SC pairs formed between the opposing connexons and appearing at least 1 % of the simulation are displayed.



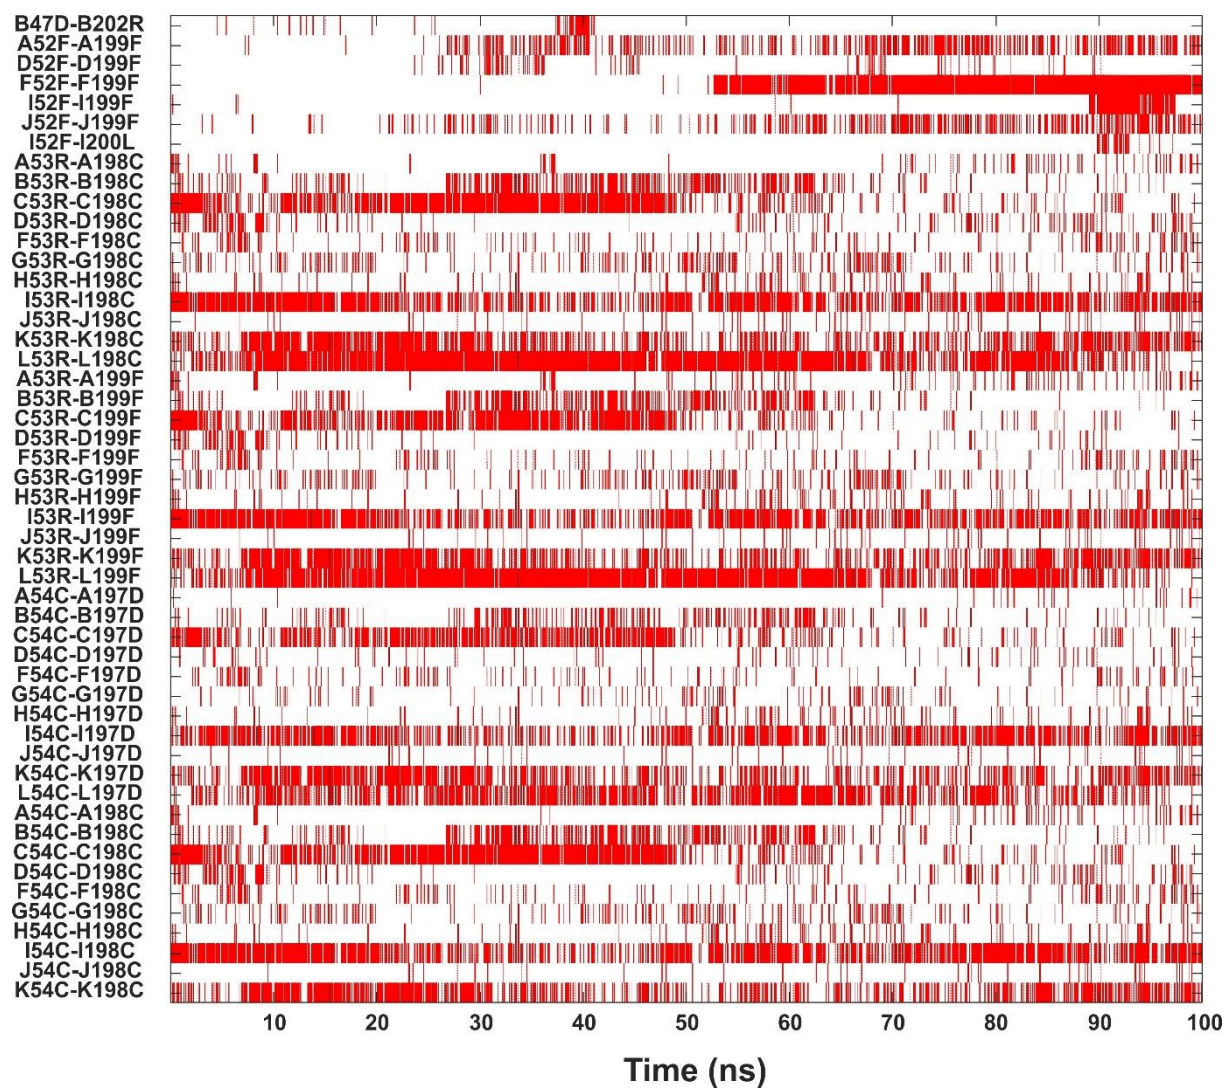

(cont.)

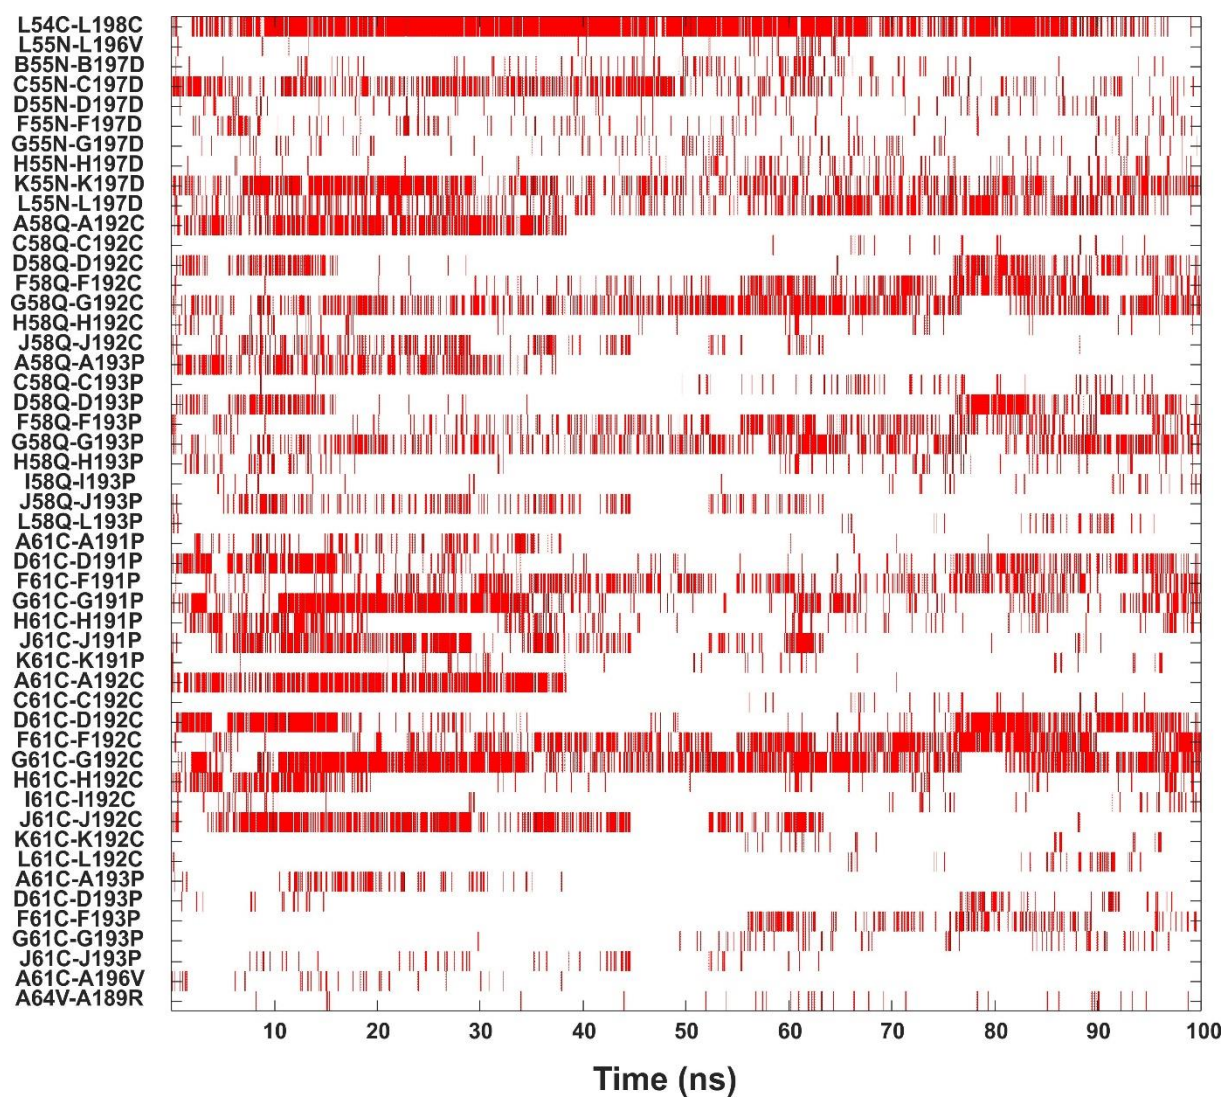



(cont.)

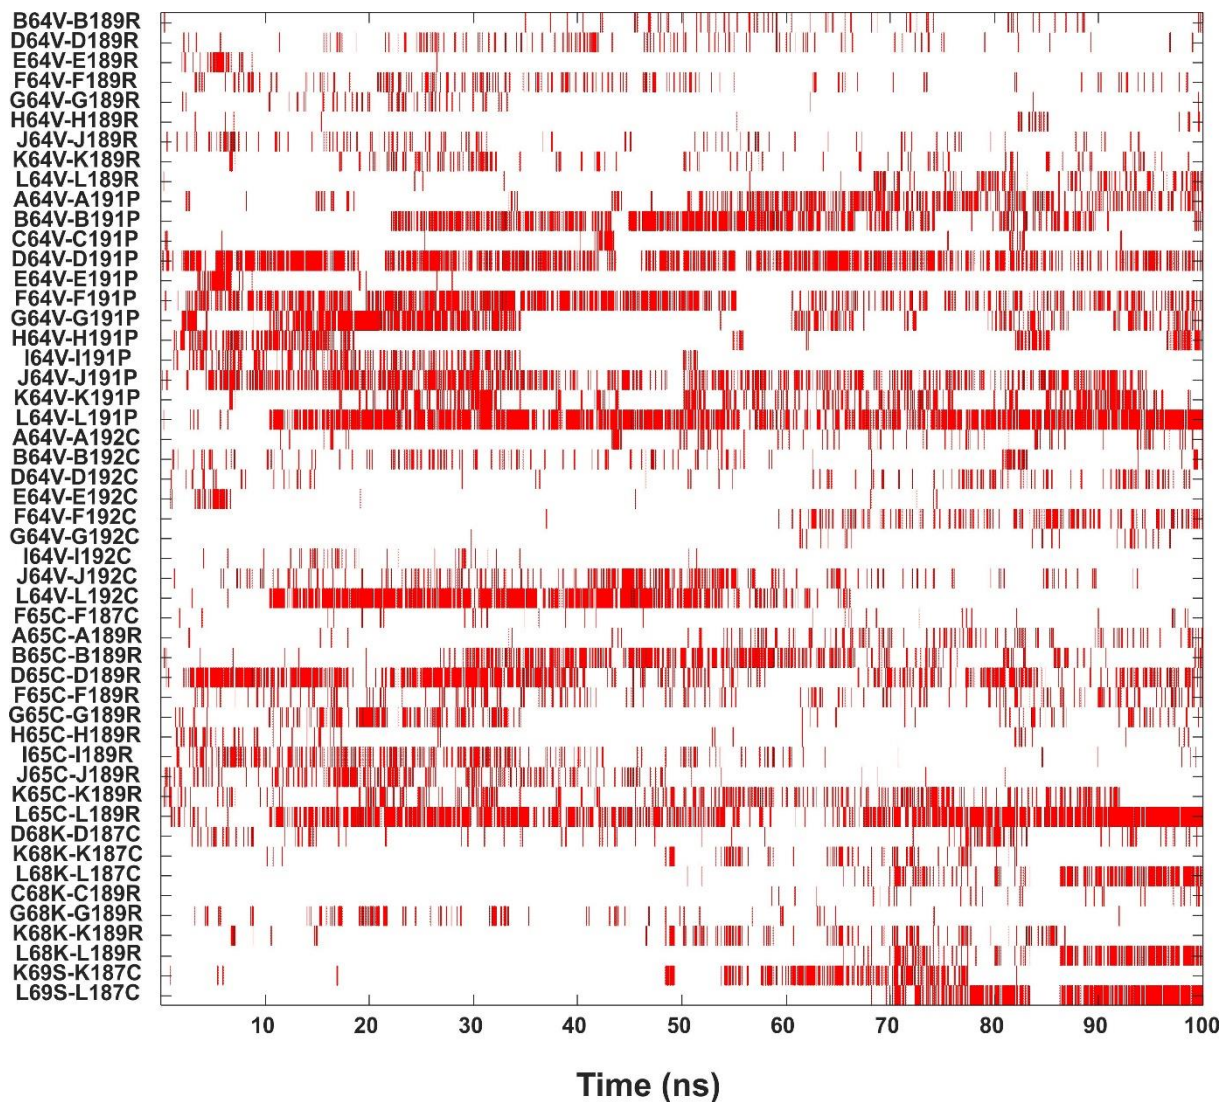

**SI Figure S5. Fluctuation dynamics of intra-subunit, inter-loop stabilization centres (SCs) of Cx43 GJC model, embedded in two membranes.** 100 ns MD simulation was performed at 300 K. S-S bonds were kept intact during the MD simulation. Each line corresponds to a single SC pair. The residues forming a single SC pair are displayed as the y axis. First letter of each residue represents the subunit (A to F corresponds to the pre-junctional, G to L corresponds to the post-junctional subunits). Only SC pairs formed between the EL1 and EL2 loops of the same subunit and appearing at least 1 % of the simulation are displayed.



## SI Tables

**SI Table S1. Functional anatomy and distribution of Cx43 GJC versus Cx36 GJC subtypes in the brain.** Connexins are expressed in mixed electrical and chemical synapses, purely electrical synapses, astrocyte-neuron and astrocytes-oligodendrocyte GJCs.

### Mixed electrical & chemical synapses

| Connexin types | Tissue                                   | Structure                                                            | Method          | Refs.                                       | GJ nomenclature used in the study                                                    |
|----------------|------------------------------------------|----------------------------------------------------------------------|-----------------|---------------------------------------------|--------------------------------------------------------------------------------------|
| unknown        | HC<br>CA3 <i>stratum lucidum</i>         | hippocampal mossy fibers (MFs) & pyramidal cells                     | Patch-clamp     | Vivar et al. 2012                           | Gap junction                                                                         |
| Cx36           | Ventral HC<br>CA3 <i>stratum lucidum</i> | MF terminals on pyramidal neuron thorny excrescences (Glutamatergic) | IF              | Nagy 2012                                   | Gap junction /gap junction plaques                                                   |
| Cx36           | HC<br>CA3 <i>stratum lucidum</i>         | MF terminals on pyramidal neuron thorny excrescences (Glutamatergic) | EM, patch-clamp | Münster-Wandowski et al. 2013               | Gap junction                                                                         |
| Cx36           | HC<br>CA3 <i>stratum lucidum</i>         | MF terminals on pyramidal neuron thorny excrescences (Glutamatergic) | EM              | Hamzei-Sichani et al. 2012                  | Gap junction/reticular gap junction                                                  |
| Cx36           | HC<br>CA3 pyramidal neurons              | GABAergic (rare)                                                     | EM              | Hamzei-Sichani et al. 2012                  | Gap junction/reticular gap junction - previously called "anastomosing" gap junctions |
| Cx36           | HC<br>CA3 <i>stratum oriens</i>          | spiny interneuron (Glutamatergic)                                    | EM              | Hamzei-Sichani et al. 2012                  | Gap junction                                                                         |
| Cx36           | HC<br>Dentate gyrus                      | dendritic spines of interneurons & unidentified neurons              | EM              | Hamzei-Sichani et al. 2012                  | Gap junction                                                                         |
| Cx36           | HC<br>Hilus                              | dendritic spines of interneurons & unidentified neurons              | EM              | Hamzei-Sichani et al. 2012                  | Gap junction/reticular gap junction - previously called "anastomosing" gap junctions |
| Cx36           | Spinal cord                              | motor nuclei of lamina IX                                            | IF              | Bautista et al. 2014, Bautista & Nagy, 2014 | Gap junction                                                                         |
| Cx36           | Spinal cord                              | laminae V-V1, medial lamina                                          | IF              | Bautista et al. 2014,                       | Gap junction                                                                         |

|                                |                                |                                      |                 |                                             |                                                                |
|--------------------------------|--------------------------------|--------------------------------------|-----------------|---------------------------------------------|----------------------------------------------------------------|
|                                |                                | VII , Clarke's nucleus               |                 | Bautista & Nagy, 2014                       |                                                                |
| Cx36                           | Trigeminal motor nucleus (Mo5) | peripherin-positive motoneurons      | IF              | Bautista et al. 2014, Bautista & Nagy, 2014 | Gap junction                                                   |
| Cx36                           | Midbrain                       | red nucleus                          | IF              | Nagy et al. 2019                            | Gap junction                                                   |
| Cx36                           | Auditory system                | ventral cochlear nucleus             | IF              | Rubio & Nagy 2015                           | Gap junction/<br>gap junction plaque                           |
| Cx36                           | Auditory system                | Medial nucleus of the trapezoid body | IF              | Rubio & Nagy 2015                           | Gap junction/<br>gap junction plaque                           |
| Cx36                           | Auditory system                | Lateral superior olivary complex     | IF              | Rubio & Nagy 2015                           | Gap junction/<br>gap junction plaque                           |
| Cx36                           | Olfactory bulb                 | Mitral cells                         | EM, patch-clamp | Christie et al. 2005                        | Gap junction                                                   |
| Cx36                           | Olfactory bulb                 | Mitral/tufted cell dendrites         | EM              | Kosaka & Kosaka 2005; Kosaka et al. 2005    | Gap junction                                                   |
| Cx36, and less abundantly Cx45 | Olfactory bulb                 | Mitral/tufted cells                  | EM, IF          | Rash et al. 2005                            | Gap junction                                                   |
| Cx36                           | Brainstem                      | Lateral vestibular nucleus           | IF              | Nagy et al. 2013                            | Gap junction/<br>gap junction plaque                           |
| Cx57                           | Retina                         | B-type horizontal cells              | EM, IF          | Pan et al. 2012, Dorgau et al. 2015         | Gap junction ("classical pentalaminar appearance not present") |

### Purely electrical synapses

|                                               |                        |                                                                    |                 |                                  |                                                                                         |
|-----------------------------------------------|------------------------|--------------------------------------------------------------------|-----------------|----------------------------------|-----------------------------------------------------------------------------------------|
| Cx36                                          | CA3 Stratum oriens     | Interneuronal dendro-dendritic GJ                                  | EM              | Hamzei-Sichani et al. 2012       | Gap junction/<br>reticular gap junction, previously called "anastomosing" gap junctions |
| Cx36                                          | Spinal cord            | Sexually dimorphic motor nuclei                                    | IF              | Bautista et al. 2014             | Gap junction                                                                            |
| Cx36 (probably, but not studied specifically) | Olfactory bulb         | Periglomerular cell dendrites                                      | EM              | Kosaka & Kosaka 2005             | Gap junction                                                                            |
| Cx36 (probably, but not studied specifically) | Olfactory bulb         | Dendrites of some interneurons different from periglomerular cells | EM              | Kosaka & Kosaka 2005             | Gap junction                                                                            |
| Cx36                                          | Cerebellar input layer | Golgi cells                                                        | Patch clamp, EM | Vervaeke et al. 2010, Szoboszlay | Gap junction/<br>gap junction plaque                                                    |

|            |                 |                                            |                 |                                      |                                      |
|------------|-----------------|--------------------------------------------|-----------------|--------------------------------------|--------------------------------------|
|            |                 |                                            |                 | et al. 2016                          |                                      |
| Cx36       | Mesencephalon   | Trigeminal nucleus                         | Patch clamp, IF | Curti et al. 2012                    | Gap junction/<br>gap junction plaque |
| Cx36       | Auditory system | Anteroventral cochlear nucleus bushy cells | IF              | Rubio & Nagy 2015                    | Gap junction/<br>gap junction plaque |
| Cx36       | Auditory system | Dorsal cochlear nucleus fusiform cells     | IF              | Rubio & Nagy 2015                    | Gap junction/<br>gap junction plaque |
| Cx50       | Retina          | A-type horizontal cells                    | IF              | O'Brien et al. 2006                  | Gap junction/<br>gap junction plaque |
| Cx50       | Retina          | A-type horizontal cells                    | EM, IF          | Dorgau et al. 2015                   | Gap junction/<br>gap junction plaque |
| Cx36, Cx45 | Retina          | Inner plexiform layer                      | EM              | Kamasawa et al. 2006, Li et al. 2008 | Gap junction/<br>gap junction plaque |

### Astrocyte-neuron GJCs

|                                                                                 |                                       |                                    |                             |                                          |                                                                             |
|---------------------------------------------------------------------------------|---------------------------------------|------------------------------------|-----------------------------|------------------------------------------|-----------------------------------------------------------------------------|
| Cx32, Cx26 (astrocyte & neuron)                                                 | Brainstem                             | Locus coeruleus                    | EM, patch clamp             | Alvarez-Maubecin et al. 2000             | Gap junction                                                                |
| Cx43 (astrocyte & subpopulation of neurons)                                     | Cerebral cortex                       | Visual, parietal, frontal cortices | IF, EM                      | Nadarajah et al. 1996                    | Gap junction, gap junctional plaques, long junction, reflexive gap junction |
| Cx43 (satellite glial cells, SGCs)<br>Cx26, Cx30, Cx30.2, Cx36 or Cx45 (neuron) | Peripheral trigeminal ganglia ex vivo | Between SGCs and neurons           | Patch clamp, LY dye tracing | Suadicani et al. 2010, Spray et al. 2019 | Gap junction                                                                |
| Cx43 (astrocyte)<br>Cx32 (neuron)                                               | Hypothalamus                          | Supraoptic nucleus                 | EM, IHC                     | Duan et al. 2004                         | Gap junction                                                                |

### Astrocyte-oligodendrocyte (OD) GJCs

|                                |                                 |                            |                 |                             |                                    |
|--------------------------------|---------------------------------|----------------------------|-----------------|-----------------------------|------------------------------------|
| Cx43 (astrocyte)/<br>Cx47 (OD) | Cerebral cortex, (hypo)thalamus | details not available      | IF              | Nagy et al. 2003            | Gap junction, gap junction plaques |
| Cx43 (astrocyte)/<br>Cx47 (OD) | Neocortex                       | Layers III–VI              | IF              | Wasseff & Scherer 2011      | Gap junction                       |
| Cx43 (astrocyte)/<br>Cx47 (OD) | Heterologous expression system  | Cell lines (Neuro2A, HeLa) | IF, patch clamp | Orthmann-Murphy et al. 2007 | Gap junction, junctional plaques   |
| Cx30 (astrocyte)/<br>Cx32 (OD) | Heterologous expression system  | Cell lines (Neuro2A, HeLa) | IF, patch clamp | Orthmann-Murphy et al. 2007 | Gap junction, junctional plaques   |

|                                           |                                                                       |                                           |           |                         |                                                                                                                                                         |
|-------------------------------------------|-----------------------------------------------------------------------|-------------------------------------------|-----------|-------------------------|---------------------------------------------------------------------------------------------------------------------------------------------------------|
| Cx43<br>(astrocyte)/<br>Cx47 (OD)         | Spinal cord<br>white matter                                           | Node of Ranvier                           | EM,<br>IF | Kamasawa<br>et al. 2005 | Conventional crystalline<br>“plaques”, non-crystalline<br>“plaques”, “string” gap<br>junctions, “ribbon” gap<br>junctions, “reticular” gap<br>junctions |
| Cx43 or Cx30<br>(astrocyte)/<br>Cx47 (OD) | Heterologous<br>expression<br>system, primary<br>astrocyte<br>culture | Cell line (HeLa),<br>primary<br>astrocyte | IF        | Magnotti et<br>al. 2011 | Gap junction, junctional<br>plaques                                                                                                                     |
| Cx30 or Cx26<br>(astrocyte)/<br>Cx32 (OD) | Heterologous<br>expression<br>system, primary<br>astrocyte<br>culture | Cell line (HeLa),<br>primary<br>astrocyte | IF        | Magnotti et<br>al. 2011 | Gap junction, junctional<br>plaques                                                                                                                     |



## SI References

- Alvarez-Maubecin, V., Garcia-Hernandez, F., Williams, J.T. & Van Bockstaele, E.J. Functional coupling between neurons and glia. *J. Neurosci.* **2000**, *20*, 4091-4098;
- Bautista, W., Nagy, J.I. Connexin36 in gap junctions forming electrical synapses between motoneurons in sexually dimorphic motor nuclei in spinal cord of rat and mouse. *Eur. J. Neurosci.* **2014**, *39*, 771-787;
- Bautista, W., McCrea, D.A., Nagy, J.I. Connexin36 identified at morphologically mixed chemical/electrical synapses on trigeminal motoneurons and at primary afferent terminals on spinal cord neurons in adult mouse and rat. *Neurosci.* **2014**, *263*, 159-180;
- Christie, J.M. Cx36 mediates spike synchrony in olfactory bulb glomeruli. *Neuron* **2005**, *46*, 761-772;
- Curti, S., Hoge, G., Nagy, J.I., Pereda, A.E. Synergy between electrical coupling and membrane properties promotes strong synchronization of neurons of the mesencephalic trigeminal nucleus. *J. Neurosci.* **2012**, *32*, 4341-4359;
- Dorgau, B., Herrling, R., Schultz, K., Greb, H., Segelken, J., Ströh, S., Bolte, P., Weiler, R., Dedek, K., Janssen-Bienhold, U. Connexin50 couples axon terminals of mouse horizontal cells by homotypic gap junctions. *J. Comp. Neurol.* **2015**, *523*, 2062-2081;.
- Dosztányi, Zs., Fiser A., Simon, I. Stabilization centers in proteins: identification, characterization and predictions. *J. Mol. Biol.* **1997**, *272*, 597-612.
- Duan, L., Yuan, H., Su, C.J., Liu, Y.Y., Rao, Z.R. Ultrastructure of junction areas between neurons and astrocytes in rat supraoptic nuclei. *World J. Gastroenterol.* **2004**, *10*, 117-121;
- Hamzei-Sichani, F. Davidson KG, Yasumura T, Janssen WG, Wearne SL, Hof PR, Traub RD, Gutiérrez R, Ottersen OP, Rash JE. Mixed electrical-chemical synapses in adult rat hippocampus are primarily glutamatergic and coupled by Connexin-36. *Front. Neuroanat.* **2012**, *6*, 13;
- Kamasawa N, Sik A, Morita M, Yasumura T, Davidson KG, Nagy JI, Rash JE. Connexin-47 and connexin-32 in gap junctions of oligodendrocyte somata, myelin sheaths, paranodal loops and Schmidt-Lanterman incisures: implications for ionic homeostasis and potassium siphoning. *Neurosci.* **2005**, *136*, 65-86; DOI: 10.1016/j.neuroscience.2005.08.027.
- Kamasawa, N. Furman CS, Davidson KG, Sampson JA, Magnie AR, Gebhardt BR, Kamasawa M, Yasumura T, Zumbunnen JR, Pickard GE, Nagy JI, Rash JE. Abundance and ultrastructural diversity of neuronal gap junctions in the OFF and ON sublaminae of the inner plexiform layer of rat and mouse retina. *Neurosci.* **2006**, *142*, 1093-1117;
- Kosaka, T., Kosaka, K. Intraglomerular dendritic link connected by gap junctions and chemical synapses in the mouse main olfactory bulb: electron microscopic serial section analyses. *Neurosci.* **2005**, *131*, 611-625;
- Kosaka, T., Deans, M.R., Paul, D.L., Kosaka, K. Neuronal gap junctions in the mouse main olfactory bulb: morphological analyses on transgenic mice. *Neurosci.* **2005**, *134*, 757-769;
- Li, X., Kamasawa, N., Ciolofan, C., Olson, C.O., Lu, S., Davidson, K.G.V., Yasumura, T., Shigemoto, R., Rash, J.E., Nagy, J.I. Connexin45-containing neuronal gap junctions in rodent

retina also contain connexin36 in both apposing hemiplaques, forming bihomotypic gap junctions, with scaffolding contributed by zonula occludens-1. *J. Neurosci.* **2008**, *28*, 9769-9789;

Maeda, S., Nakagawa, S., Suga, M., Yamashita, E., Oshima, A., Fujiyoshi, Y., Tsukihara, T. Structure of the connexin 26 gap junction channel at 3.5 Å resolution. *Nature* **2009**, *458*, 597-602.

Magnotti, L.M., Goodenough, D.A., Paul, D.L. Functional heterotypic interactions between astrocyte and oligodendrocyte connexins. *Glia* **2011**, *59*, 26-34;

Münster-Wandowski, A., Gómez-Lira, G., Gutiérrez, R. Mixed neurotransmission in the hippocampal mossy fibers. *Front. Cell. Neurosci.* **2013**, *7*, 210;

Nadarajah, B., Thomaidou, D., Evans, W.H., Parnavelas, J.G. Gap junctions in the adult cerebral cortex: regional differences in their distribution and cellular expression of connexins. *J. Comp. Neurol.* **1996**, *376*, 326-342;

Nagy, J.I. Evidence for connexin36 localization at hippocampal mossy fiber terminals suggesting mixed chemical/electrical transmission by granule cells. *Brain Res.* **2012**, *1487*, 107-122;

Nagy, J.I., Bautista, W., Blakley, B., Rash, J.E. Morphologically mixed chemical-electrical synapses formed by primary afferents in rodent vestibular nuclei as revealed by immunofluorescence detection of connexin36 and vesicular glutamate transporter-1. *Neurosci.* **2013**, *252*, 468-488;

Nagy, J.I., Ionescu, A.V., Lynn, B.D., Rash, J.E. Connexin29 and connexin32 at oligodendrocyte and astrocyte gap junctions and in myelin of the mouse central nervous system. *J. Comp. Neurol.* **2003**, *464*, 356-370;

Nagy, J.I., Pereda, A.E., Rash, J.E. On the occurrence and enigmatic functions of mixed (chemical plus electrical) synapses in the mammalian CNS. *Neurosci. Lett.* **2019**, *695*, 53-64;

Nyikos, L., Simon, Á., Barabás, P., Kardos, J. Ligand-specific conformations of an ionotropic glutamate receptor. *Protein Engineering.* **2002**, *15*, 717-720.

O'Brien, J.J., Li, W., Pan, F., Keung, J., O'Brien, J., Massey, S.C. Coupling between A-type horizontal cells is mediated by connexin 50 gap junctions in the rabbit retina. *J. Neurosci.* **2006**, *26*, 11624-11636;

Orthmann-Murphy, J.L., Freidin, M., Fischer, E., Scherer, S.S., Abrams, C.K. Two distinct heterotypic channels mediate gap junction coupling between astrocyte and oligodendrocyte connexins. *J. Neurosci.* **2007**, *27*, 13949-13957;

Pan, F., Keung, J., Kim, I.B., Snuggs, M.B., Mills, S.L., O'Brien, J., Massey, S.C. Connexin 57 is expressed by the axon terminal network of B-type horizontal cells in the rabbit retina. *J. Comp. Neurol.* **2012**, *520*, 2256-2274;

Rash, J.E. Davidson KG, Kamasawa N, Yasumura T, Kamasawa M, Zhang C, Michaels R, Restrepo D, Ottersen OP, Olson CO, Nagy JI. Ultrastructural localization of connexins (Cx36, Cx43, Cx45), glutamate receptors and aquaporin-4 in rodent olfactory mucosa, olfactory nerve and olfactory bulb. *J. Neurocytol.* **2005**, *34*, 307-341;

Rubio, M.E.; Nagy, J.I. Connexin36 expression in major centers of the auditory system in the CNS of mouse and rat: Evidence for neurons forming purely electrical synapses and morphologically mixed synapses. *Neurosci.* **2015**, *303*, 604-629;

Simon, Á., Dosztányi, Zs., Magyar, Cs., Szirtes, G., Rajnavölgyi, É., Simon, I. Stabilization centers and protein stability. *Theor. Chem. Acc.* **2001**, *106*, 121-127;

Simon, Á., Magyar, Cs., Héja, L., Kardos, J. Peptide binding sites of connexin proteins. *Chemistry* **2020**, *2*, 662-673;

Spray, D.C., Iglesias, R., Shraer, N., Suadicani, S.O., Belzer, V., Hanstein, R., Hanani, M. Gap junction mediated signaling between satellite glia and neurons in trigeminal ganglia. *Glia* **2019**, *67*, 791-801;

Suadicani, S.O., Cherkas, P.S., Zuckerman, J., Smith, D.N., Spray, D.C., Hanani, M. Bidirectional calcium signaling between satellite glial cells and neurons in cultured mouse trigeminal ganglia. *Neuron Glia Biol.* **2010**, *6*, 43-51;

Szoboszlay, M., Lőrincz, A., Lanore, F., Vervaeke, K., Silver, R.A., Nusser, Z. Functional properties of dendritic gap junctions in cerebellar Golgi cells. *Neuron*, **2016**, *90*, 1043-1056;

Vervaeke, K., Lorincz, A., Gleeson, P., Farinella, M., Nusser, Z., Silver, R.A. Rapid desynchronization of an electrically coupled interneuron network with sparse excitatory synaptic input. *Neuron* **2010**, *67*, 435-451;

Vivar, C., Traub, R.D., Gutiérrez, R. Mixed electrical-chemical transmission between hippocampal mossy fibers and pyramidal cells. *Eur. J. Neurosci.* **2012**, *35*, 76-82;

Wasseff, S.K., Scherer, S.S. Cx32 and Cx47 mediate oligodendrocyte:astrocyte and oligodendrocyte:oligodendrocyte gap junction coupling. *Neurobiol. Dis.* **2011**, *42*, 506-513;
